# Supplementary material
Source: Springer Nature journal article supplement (https://www.springermedizin.de/resource/supplementary/12955_2004_254_MOESM4_ESM.pdf/9559994)

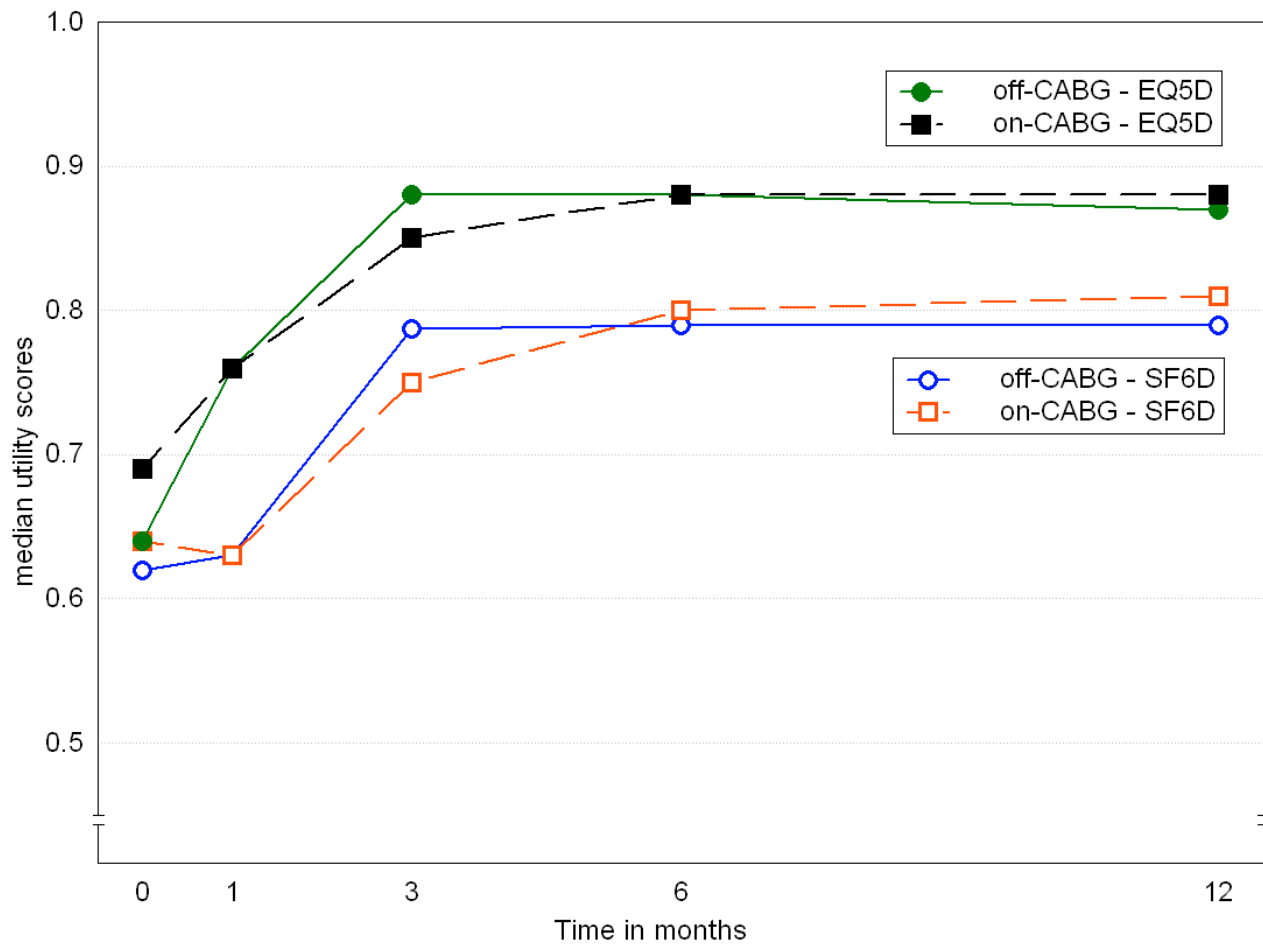

Supplement: MOESM4 [file 9559994]
